# Supplementary figures and images for: Antioxidant Properties Mediate Nephroprotective and Hepatoprotective Activity of Essential Oil and Hydro-Alcoholic Extract of the High-Altitude Plant Skimmia anquetilia
Source: MDPI journal article supplement (doi:10.3390/antiox12061167), 2023-05-28

## Supplementary File

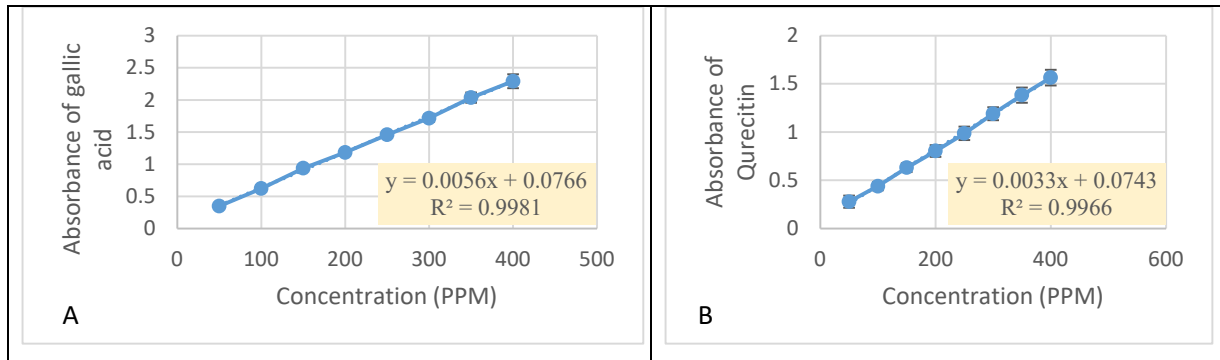

**Figure S1.** A and B showed TPC and TFC of Gallic acid and quercetin. SEM (n=3).

Supplement: s1 [file s1]
